# Supplementary material
Source: HighWire-hosted journal article supplement (http://gut.bmj.com/highwire/filestream/192727/field_highwire_adjunct_files/1/58101375webonlytable1A.xls)
Supplement: 58101375webonlytable1A.xls [file 58101375webonlytable1A.xls]

## Sheet: Plasma
Supplementary table 1A
The full list of miRNAs (95 miRNAs and U6 snRNA) analyzed in plasma samples of CRC patients compared to healthy controls using real-time PCR based miRNA profiling arrays.
MicroRNA	MirBase #	Plasma from 5 CRC patients & 5 healthy controls				Tumor expression level compared to normal (T/N)
		CRC patients		Healthy controls
		Average Ct values	Normalized to U6	Average Ct values	Normalized to U6
miR-153	MIMAT0000439	34.3915	0.12487	35.2987	0.0127024	9.8304
miR-373	MIMAT0000726	31.0185	1.29373	31.8947	0.134462	9.62153
miR-204	MIMAT0000265	33.2439	0.276648	34.0596	0.0299857	9.22602
miR-202	MIMAT0002811	26.5926	27.8079	27.399	3.03361	9.16663
miR-181c	MIMAT0000258	22.1253	615.131	22.7565	75.7662	8.1188
miR-137	MIMAT0000429	36.4682	0.0296002	36.9666	0.00399779	7.40413
miR-125a	MIMAT0000443	28.0306	10.2631	28.5279	1.3871	7.39902
miR-218	MIMAT0000275	32.54	0.450625	32.8869	0.0675961	6.66644
miR-135b	MIMAT0000758	35.57	0.0551689	35.89	0.00843147	6.54322
miR-210	MIMAT0000267	30.9766	1.33177	31.1388	0.227074	5.86494
miR-206	MIMAT0000462	30.9849	1.32416	31.1241	0.229397	5.77235
miR-181d	MIMAT0002821	31.3775	1.00867	31.4612	0.181589	5.55467
miR-203	MIMAT0000264	33.9562	0.168842	33.9946	0.0313668	5.38284
miR-200b	MIMAT0000318	35.6084	0.0537208	35.6412	0.0100186	5.36213
miR-92	MIMAT0000092	25.5203	58.4731	25.2839	13.1417	4.44942
miR-222	MIMAT0000279	30.3603	2.04164	30.1688	0.444791	4.5901
miR-200a	MIMAT0000682	36.7211	0.0248411	36.4897	0.00556385	4.46474
miR-132	MIMAT0000426	28.1226	9.62943	27.8543	2.21253	4.35222
miR-155	MIMAT0000646	31.6599	0.829363	31.375	0.192772	4.3023
miR-17-3p	MIMAT0000071	30.9787	1.32985	30.6515	0.318313	4.17782
miR-181b	MIMAT0000257	29.3383	4.14594	28.9234	1.05454	3.93151
miR-136	MIMAT0000448	34.4252	0.121983	33.9956	0.0313447	3.89165
miR-200c	MIMAT0000617	33.0872	0.308379	32.5992	0.082514	3.73729
miR-134	MIMAT0000447	32.3413	0.517175	31.7157	0.152229	3.39735
miR-133a	MIMAT0000427	30.9423	1.36389	30.31	0.403315	3.38169
miR-125b	MIMAT0000423	30.4793	1.87996	29.8218	0.565723	3.32311
miR-183	MIMAT0000261	34.3934	0.124703	33.64	0.040108	3.10918
miR-95	MIMAT0000094	34.2854	0.134402	33.5005	0.0441799	3.04215
miR-128b	MIMAT0000676	33.616	0.213758	32.815	0.0710491	3.0086
miR-205	MIMAT0000266	33.0345	0.319852	32.1998	0.108836	2.93883
miR-145	MIMAT0000437	33.1331	0.298722	32.0416	0.121449	2.45966
miR-154	MIMAT0000452	33.6964	0.202161	32.5304	0.0865443	2.33592
miR-190	MIMAT0000458	37.7758	0.0119591	36.5671	0.00527331	2.26785
miR-101-1	MIMAT0000099	30.7948	1.51073	29.5628	0.677006	2.23149
miR-30a-3p	MIMAT0000088	32.4605	0.476146	31.1471	0.225766	2.10902
miR-196a	MIMAT0000226	35.2241	0.0701178	33.7616	0.0368638	1.90208
miR-372	MIMAT0000724	32.7454	0.39084	31.2794	0.205988	1.89739
miR-192	MIMAT0000222	31.984	0.662515	30.4765	0.359368	1.84356
miR-150	MIMAT0000451	30.8089	1.49599	29.2428	0.845104	1.77018
miR-181a	MIMAT0000256	24.6735	105.166	23.0839	60.3842	1.74161
miR-488	MIMAT0002804	35.8085	0.0467643	34.1774	0.0276336	1.6923
miR-149	MIMAT0000450	34.9482	0.0848951	33.2691	0.0518654	1.63683
miR-9-1	MIMAT0000441	37.6925	0.0126695	36.0131	0.00774199	1.63646
miR-151	MIMAT0000757	30.2251	2.24214	28.5394	1.37607	1.62938
miR-30c	MIMAT0000244	31.9858	0.661666	30.2531	0.419546	1.5771
miR-188	MIMAT0000457	32.9318	0.343457	31.1695	0.222288	1.5451
miR-214	MIMAT0000271	31.9626	0.672404	30.1782	0.441897	1.52163
miR-122a	MIMAT0000421	32.7658	0.385346	30.8129	0.284622	1.35389
miR-185	MIMAT0000455	30.6481	1.67243	28.6774	1.25063	1.33728
miR-197	MIMAT0000227	31.5479	0.89636	29.5541	0.681105	1.31604
miR-141	MIMAT0000432	34.8047	0.0937741	32.8017	0.0717091	1.3077
miR-296	MIMAT0000690	33.3742	0.252753	31.2423	0.211342	1.19594
miR-7	MIMAT0000252	33.7948	0.188839	31.6354	0.160943	1.17333
miR-186	MIMAT0000456	33.9241	0.172653	31.6556	0.158705	1.08789
miR-146a	MIMAT0000449	33.3581	0.255594	31.0818	0.236211	1.08206
miR-30b	MIMAT0000420	32.132	0.597889	29.7901	0.578317	1.03384
miR-194	MIMAT0000460	32.0749	0.622049	29.7067	0.612699	1.01526
miR-198	MIMAT0000228	36.4509	0.0299593	33.7728	0.03658	0.819008
miR-17-5p	MIMAT0000070	32.7896	0.379047	30.0913	0.469333	0.80763
miR-221	MIMAT0000278	31.1857	1.15211	28.4663	1.44765	0.795844
let-7-family*	MIMAT0000062, MIMAT0000064, MIMAT0000065, MIMAT0000067	37.3536	0.0160246	34.6246	0.0202687	0.790607
miR-93	MIMAT0000093	31.2619	1.09282	28.5243	1.39062	0.785845
miR-15a	MIMAT0000068	33.6129	0.214203	30.7278	0.301912	0.709488
miR-199a+b*	MIMAT0000231, MIMAT0000263	35.1406	0.0742945	31.9364	0.130637	0.568711
miR-18a	MIMAT0000072	35.1574	0.0734344	31.9208	0.132054	0.556094
miR-19a+b*	MIMAT0000073, MIMAT0000074	28.6775	6.55479	25.4402	11.7928	0.55583
miR-191	MIMAT0000440	31.5148	0.917147	28.2411	1.69216	0.541998
miR-30a-5p	MIMAT0000087	30.2252	2.24198	26.8905	4.31552	0.519517
miR-219	MIMAT0000276	37.5447	0.0140362	34.1594	0.0279819	0.501618
miR-143	MIMAT0000435	34.6551	0.104018	31.1174	0.230459	0.45135
miR-103	MIMAT0000101	34.0808	0.154872	30.5263	0.347163	0.446109
miR-24	MIMAT0000080	32.3779	0.504202	28.6894	1.24024	0.406537
miR-25	MIMAT0000081	30.4878	1.86885	26.7231	4.8463	0.385624
miR-27a+b*	MIMAT0000084, MIMAT0000419	33.621	0.213007	29.6621	0.631936	0.337071
miR-106b	MIMAT0000680	33.6308	0.211569	29.5813	0.66838	0.31654
miR-21	MIMAT0000076	30.8871	1.41701	26.6302	5.16887	0.274143
miR-10b	MIMAT0000254	34.0029	0.163474	29.7355	0.600624	0.272174
miR-26b	MIMAT0000083	37.0153	0.0202582	32.6201	0.0813268	0.249096
miR-29a+b+c*	MIMAT0000086, MIMAT0000100, MIMAT0000681	34.2969	0.13333	29.8568	0.552176	0.241463
miR-22	MIMAT0000077	32.0472	0.634086	27.5263	2.7774	0.228302
miR-107	MIMAT0000104	35.5604	0.055536	30.9346	0.261601	0.212293
miR-215	MIMAT0000272	37.4389	0.0151039	32.7851	0.0725377	0.208222
miR-20a	MIMAT0000075	32.8817	0.355606	28.1525	1.79938	0.197627
miR-26a	MIMAT0000082	33.8774	0.178327	29.0296	0.979678	0.182026
miR-195	MIMAT0000461	33.2571	0.274124	28.391	1.52517	0.179734
miR-106a	MIMAT0000103	33.7652	0.19275	28.7458	1.19264	0.161616
miR-23a	MIMAT0000078	31.1907	1.14812	25.8254	9.02952	0.127152
miR-142-3p	MIMAT0000434	33.2338	0.278597	27.3241	3.19522	0.0871916
miR-126	MIMAT0000444	33.3952	0.249096	27.4793	2.8693	0.0868142
miR-223	MIMAT0000280	31.0039	1.30686	24.6619	20.2252	0.0646152
miR-16	MIMAT0000069	31.9711	0.668442	25.5343	11.0479	0.060504
miR-15b	MIMAT0000417	35.8627	0.0450384	28.2028	1.73775	0.0259177
miR-1-1	MIMAT0000416	ND		ND
miR-224	MIMAT0000281	ND		ND
miR-140	MIMAT0000431	ND		ND
U6 snRNA		31.3869		29.0002
ND: Not detected
*Co-detection of miRNA family members in this miRNA profiling array
